# Supplementary material for: Class A scavenger receptor MARCO negatively regulates Ace expression and aldosterone production
Source: eLife. 2025 Dec 24;12:RP91318. doi: 10.7554/eLife.91318 (PMC12736925; doi:10.7554/eLife.91318)
Supplement: Source data 1. [file elife-91318-data1.xlsx]

## Sheet: 1B
WT	Marco-/-
1600.31	3230.83
1246.76	2538.9
500.224	1357.53
582.831	1282.45
1125.6	2708.48
551.716	2216.77
551.716	2352.94
141.495	2426.51
213.042	1230.26
1336.88	1148.48
1362.34	1525.95
737.625	2515.6
1375.33
850.203
1366.65
624.962
827.166
2027.99

## Sheet: 1C
WT	Marco-/-
153.796	286.593
84.7159	117.116
71.1022	192.088
105.672	172.776
94.4603	85.7341
68.711
126.778
198.147

## Sheet: 1D
WT	Marco-/-
348.728	614.394
424.51	551.317
137.796	421.303
573.413	707.767
1085.03	273.123
371.165	180.137
536.404	751.481
530.945	442.223
140.49	390.287
	233.477
	343.59

## Sheet: 1E
WT	Marco-/-
66.8201	37.8121
78.1666	50.2424
109.368	140.234
9.61145	41.809
88.8109	119.019
85.8727	38.7488
144.904	122.615
35.1427	100.954
22.2779
32.4042
43.1047
28.694

## Sheet: 1F
WT	Marco-/-
3.8	3.8
3.6	4
4.5	3.8
4.7	4
4.6	3.5
5	3.2
5
4.7
4.7
4.7
4.8

## Sheet: 1G
WT	Marco-/-
6.2	5.5
4.9	6.4
5.9	6.3
5.4	5.7
4.8	5.6

## Sheet: 1H
WT	Marco-/-
0.620684	0.77729
0.655746	0.984179
1.25539	0.687165
1.13207	0.975692
0.941383	0.855702
0.637425	0.616004
1.05187	0.729572
0.909257	0.582548
1.27744	0.862669
1.39348	0.444375
	0.870438
	0.78048
	0.824473

## Sheet: 1I
WT	Marco-/-
11.7849	6.50939
13.4072	6.60502
10.0101	5.832
11.1227	9.29057
11.917	9.56118

## Sheet: 2E
WT Lung	Marco-/- Lung	WT AG	Marco-/- AG
27.7197	0.0001536	0.0653488	0.0012094
30.5662	0.0002675	0.0326972	0.0004426
25.4317	0.0097946	0.0076524	0.0003887

## Sheet: 3A
Star		Cyp11a1		Hsd3b1		Cyp11b1		Cyp11b2
WT	Marco-/-	WT	Marco-/-	WT	Marco-/-	WT	Marco-/-	WT	Marco-/-
3.97451	1.79779	1.18779	0.513676	1.19011	0.22726	2.64329	0.506596	2.92602	1.76953
0.78737	2.36291	0.43656	0.50032	0.75289	0.817175	0.62666	0.956178	0.92089	2.39962
1.18751	4.51657	0.33802	0.485352	0.77959	1.18198	0.76277	1.79152	1.29243	4.9519
1.97796	0.932789	0.45684	0.219938	0.36715	0.62556	0.842	2.15344	2.19497	0.910172
0.81588	1.57506	0.20866	0.382575	0.58233	0.281328	0.73413	0.561347	0.66154	1.53594
0.35354	0.426623	2.40913	2.78698	0.92395	0.378134	0.28708	0.698426	0.36281	0.747051
1.07822	0.65075	3.10462	2.02098	1.62423	0.380013	0.5986	0.432716	1.37323	0.855036
0.65052	0.392627	2.21846	0.97282	1.19784	0.405205	0.41829	0.501139	0.65017	0.503859
0.03426	0.420398	0.12627	0.164081	0.48714	1.52001	1.28556	1.8287	0.10699	1.32736
0.09107	0.00585863	0.17111	0.253548	1.45941	0.547634	1.11355	0.894325	0.25729	0.0329223
0.04916	0.873951	0.34254	0.50579	1.63536	0.980742	1.68807	1.80842	0.25367	2.29138

[truncated: 16 more sheets: 3B, 3D, 3E, 4A, 4C, 4D, 4E, 4F, 4G, 4H, 4I, 4J, 4K, 4L, 4M, 5D]
